# Supplementary material
Source: ML conference proceedings conference paper supplement (https://openreview.net/forum?id=YFQ0Xx5YlW)

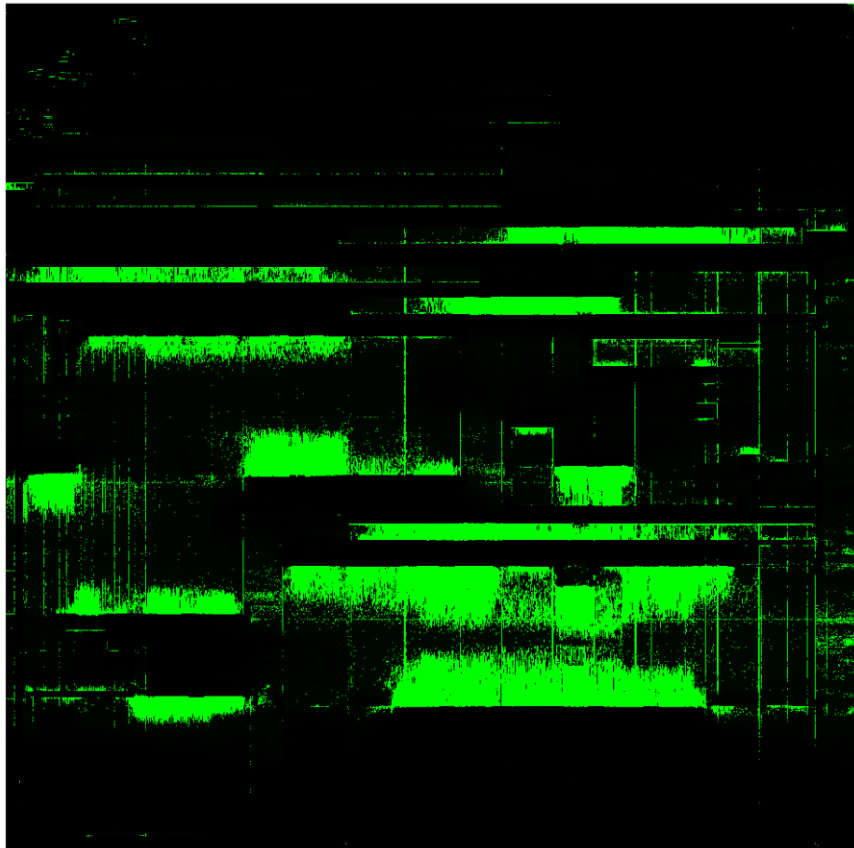

Lay-Net

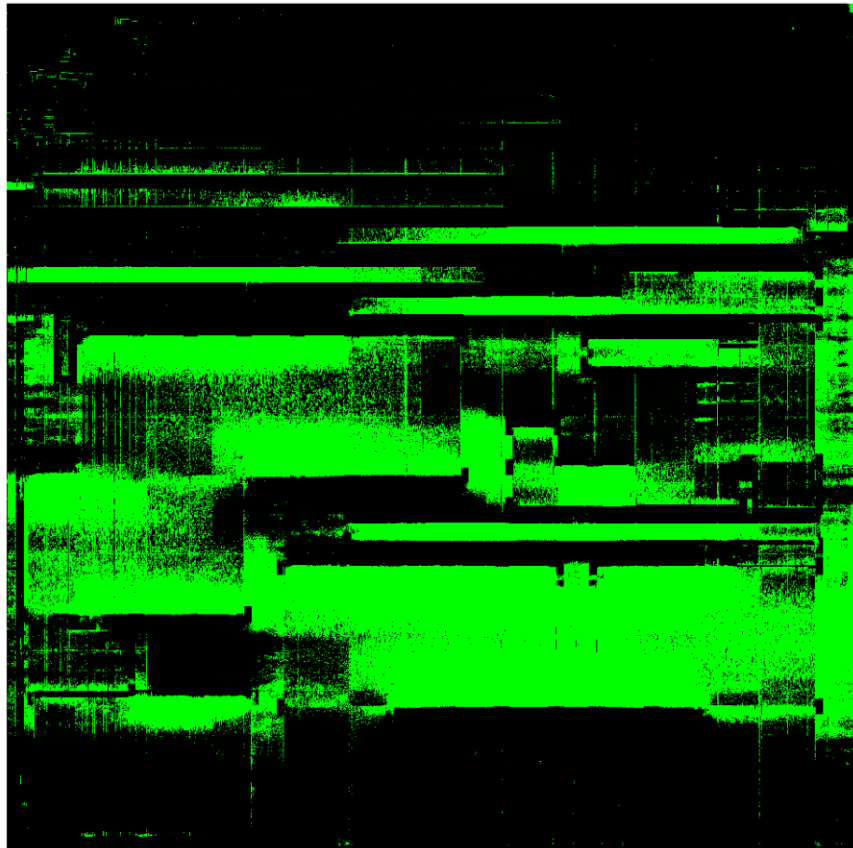

Our Bottleneck

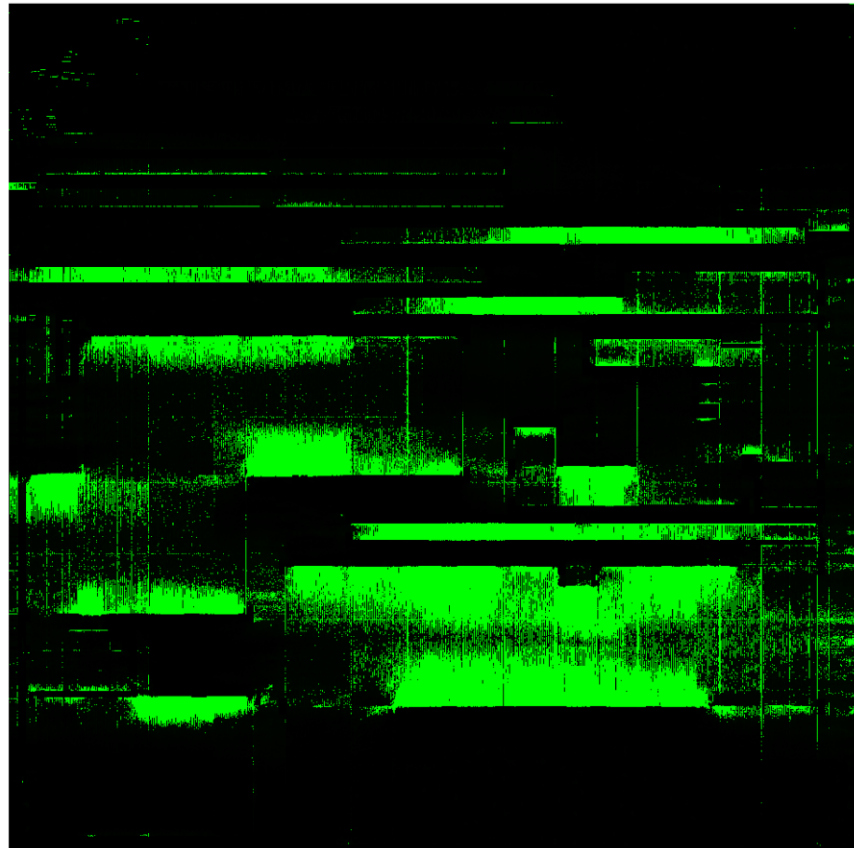

MIHC (Ours)

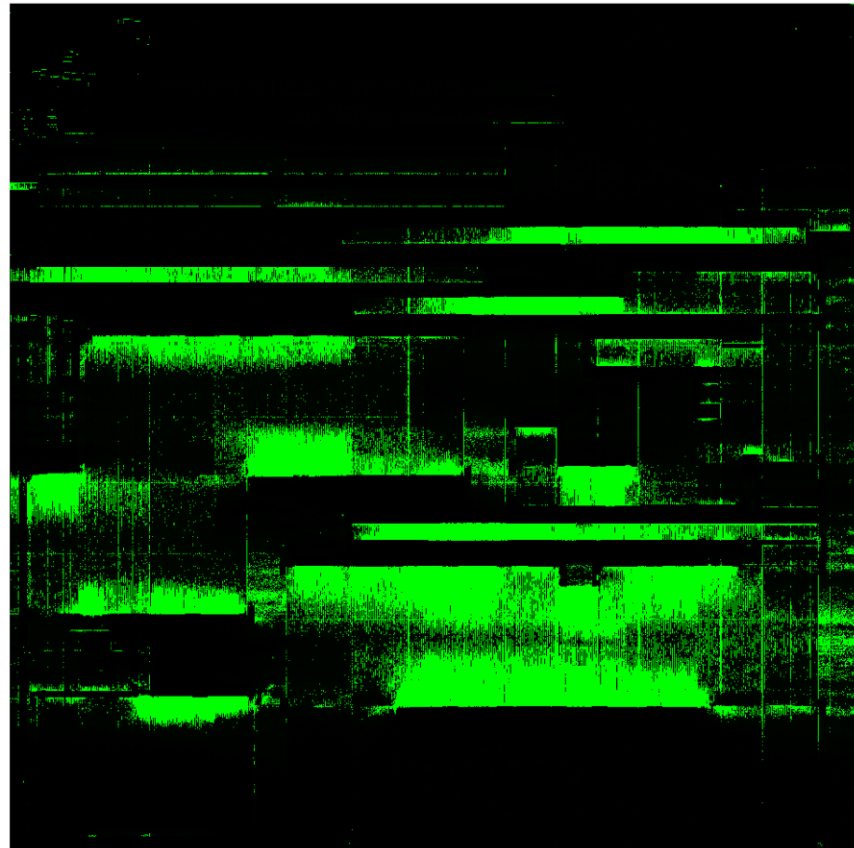

Gound Truth

Supplement: supplementary_material [file heat_map.pdf › MIHC-main/figure/heat_map.pdf]
